# Supplementary material for: Therapeutic Anticoagulation Delays Death in COVID-19 Patients: Cross-Sectional Analysis of a Prospective Cohort
Source: PubMed Central journal article supplement (PMC7519875; doi:10.1055/s-0040-1716721), 2020-09-26
Supplement: 10-1055-s-0040-1716721-s200040.pdf [file 10-1055-s-0040-1716721-s200040.pdf]

**Supplementary Table S1** Multivariate Cox proportional hazards model (severe disease,  $n = 52$ )

|                               | Hazard ratio      | Confidence interval | Significance |
|-------------------------------|-------------------|---------------------|--------------|
| Ever smoker                   | 1.36              | 0.75–2.48           | 0.308        |
| CKD grade 3 or above          | 0.67              | 0.32–1.33           | 0.266        |
| Prophylactic anticoagulationc | 0.36              | 0.16–0.8            | <b>0.014</b> |
| Therapeutic anticoagulationc  | 0.27              | 0.08–0.55           | <b>0.001</b> |
| CS treatment duration (days)  | 0.87 <sup>a</sup> | 0.76–0.98           | <b>0.033</b> |

Abbreviations: CKD, chronic kidney disease; ICU, intensive care unit; CS, corticosteroid.

Note: Bold represents statistically significant values.

<sup>a</sup>Per 1-day increase.

<sup>b</sup>Compared to No anticoagulation.

**Supplementary Table S2** Multivariate Cox proportional hazards model (critical disease,  $n = 75$ )

|                               | Hazard ratio      | Confidence interval | Significance |
|-------------------------------|-------------------|---------------------|--------------|
| Ever smoker                   | 2.20              | 1.33–3.66           | 0.002        |
| CKD grade 3 or above          | 0.70              | 0.41–1.17           | 0.18         |
| Prophylactic anticoagulationc | 0.15              | 0.04–0.73           | <b>0.022</b> |
| Therapeutic anticoagulationc  | 0.07              | 0.02–0.32           | <b>0.002</b> |
| CS treatment duration (days)  | 0.89 <sup>a</sup> | 0.84–0.95           | <b>0.001</b> |

Abbreviations: CKD, chronic kidney disease; ICU, intensive care unit; CS, corticosteroid.

Note: Bold represents statistically significant values.

<sup>a</sup>Per 1-day increase.

<sup>b</sup>Compared to No anticoagulation.
